# Supplementary material
Source: Springer Nature journal article supplement (https://openaccess.sgul.ac.uk/id/eprint/113143/27/12874_2008_395_MOESM5_ESM.PDF)
Supplement: MOESM5 [file 12874_2008_395_MOESM5_ESM.PDF]

## Additional file 5: Main characteristics of included manuscript cohort studies

| Study                 | Methods                                                                                                                                                                                                                                                                                                                                                                                                                                    | Main findings                                                                                                                                                                                                                                                                                                                                                                                                                                                                                                                                                                           |
|-----------------------|--------------------------------------------------------------------------------------------------------------------------------------------------------------------------------------------------------------------------------------------------------------------------------------------------------------------------------------------------------------------------------------------------------------------------------------------|-----------------------------------------------------------------------------------------------------------------------------------------------------------------------------------------------------------------------------------------------------------------------------------------------------------------------------------------------------------------------------------------------------------------------------------------------------------------------------------------------------------------------------------------------------------------------------------------|
| Olson et al 2002[69]  | <p>Cohort study of 745 manuscripts of controlled trials submitted to JAMA from 02/1996-08/1999.</p> <p>Outcome classification:</p> <ol style="list-style-type: none"> <li>1. Statistically significant (<math>p &lt; 0.05</math>) for the primary outcome</li> <li>2. Statistically non-significant</li> <li>3. Unclear</li> </ol>                                                                                                         | <p>Proportion of studies with different results:</p> <ul style="list-style-type: none"> <li>- 51.4% (n=383) with significant results</li> <li>- 45.7% (n=341) with non-significant results</li> <li>- 2.8% (n=21) with unclear results.</li> </ul> <p>Acceptance rate:</p> <ul style="list-style-type: none"> <li>- 20.4% (78/383) for significant results</li> <li>- 15.0% (51/341) for non-significant results</li> <li>- 19.0% (4/21) for unclear results.</li> </ul> <p>Logistic regression analysis: significant vs non-significant results OR=1.30 (95% CI 0.87 to 1.96)</p>      |
| Lee et al 2006[66]    | <p>Cohort study of 1107 manuscripts of original research (including qualitative research, excluding single case reports) submitted to BMJ, Lancet and Annals of Internal Medicine between 01-03/2003 and between 11/2003-02/2004.</p> <p>Outcome classification:</p> <ol style="list-style-type: none"> <li>1. Statistically significant (<math>p &lt; 0.05</math>) for the primary outcome</li> <li>2. Non-significant</li> </ol>         | <p>Proportion of different statistical results:</p> <ul style="list-style-type: none"> <li>- 86.8% (n=718) with significant results</li> <li>- 13.2% (n=109) with non-significant results</li> </ul> <p>Acceptance rate:</p> <ul style="list-style-type: none"> <li>- 4.9% (35/718) for significant results</li> <li>- 6.4% (7/109) for non-significant results.</li> </ul> <p>Multivariate analysis: OR=0.83 (95% CI 0.34 to 1.96).</p>                                                                                                                                                |
| Lynch et al 2007[67]  | <p>Cohort study of 209 manuscripts of original research on hip or knee arthroplasty submitted to The Journal of Bone and Joint Surgery (American Volume) between 01/2004-06/2005.</p> <p>Outcome classification:</p> <ol style="list-style-type: none"> <li>1. Positive or favourable or significant</li> <li>2. Negative or nonsupportive or no difference</li> <li>3. Not analyzable - unclear</li> </ol>                                | <p>Proportion of studies with different results:</p> <ul style="list-style-type: none"> <li>- 70.8% (n=148) with positive results</li> <li>- 23.4% (n=49) with negative results</li> <li>- 5.7% (n=12) with unclear results.</li> </ul> <p>Acceptance rate:</p> <ul style="list-style-type: none"> <li>- 30.4% (45/148) for positive results</li> <li>- 36.7% (18/49) for negative results</li> <li>- 8.3% (1/12) for unclear results.</li> </ul> <p>Difference in publication rate between positive and negative outcomes was not statistically significant (<math>p=0.41</math>).</p> |
| Okike et al 2008 [68] | <p>Cohort study of 855 manuscripts as scientific articles submitted to the Journal of Bone and Joint Surgery (American Version) between 01/2004-06/2005.</p> <p>Outcome classification:</p> <ol style="list-style-type: none"> <li>1. Positive – favoured experimental item</li> <li>2. Negative – favoured existing standard of care over the experimental item</li> <li>3. Neutral – no difference</li> <li>4. Not applicable</li> </ol> | <p>Proportion of studies with different results:</p> <ul style="list-style-type: none"> <li>- 72.5% (n=620) with positive results</li> <li>- 12.3% (n=105) with negative results</li> <li>- 15.2% (n=130) with neutral results.</li> </ul> <p>Acceptance rate:</p> <ul style="list-style-type: none"> <li>- 21.3% (132/620) for positive results</li> <li>- 21.0% (22/105) for negative findings</li> <li>- 24.6% (32/130) for neutral results</li> </ul> <p>Multivariate analysis: positive vs nonpositive OR=0.92 (95% CI 0.62 to 1.35).</p>                                          |
